# Supplementary material
Source: PubMed Central journal article supplement (PMC4011001)
Supplement: JB.01418-13_zjb999093113so1.pdf [file JB.01418-13_zjb999093113so1.pdf]

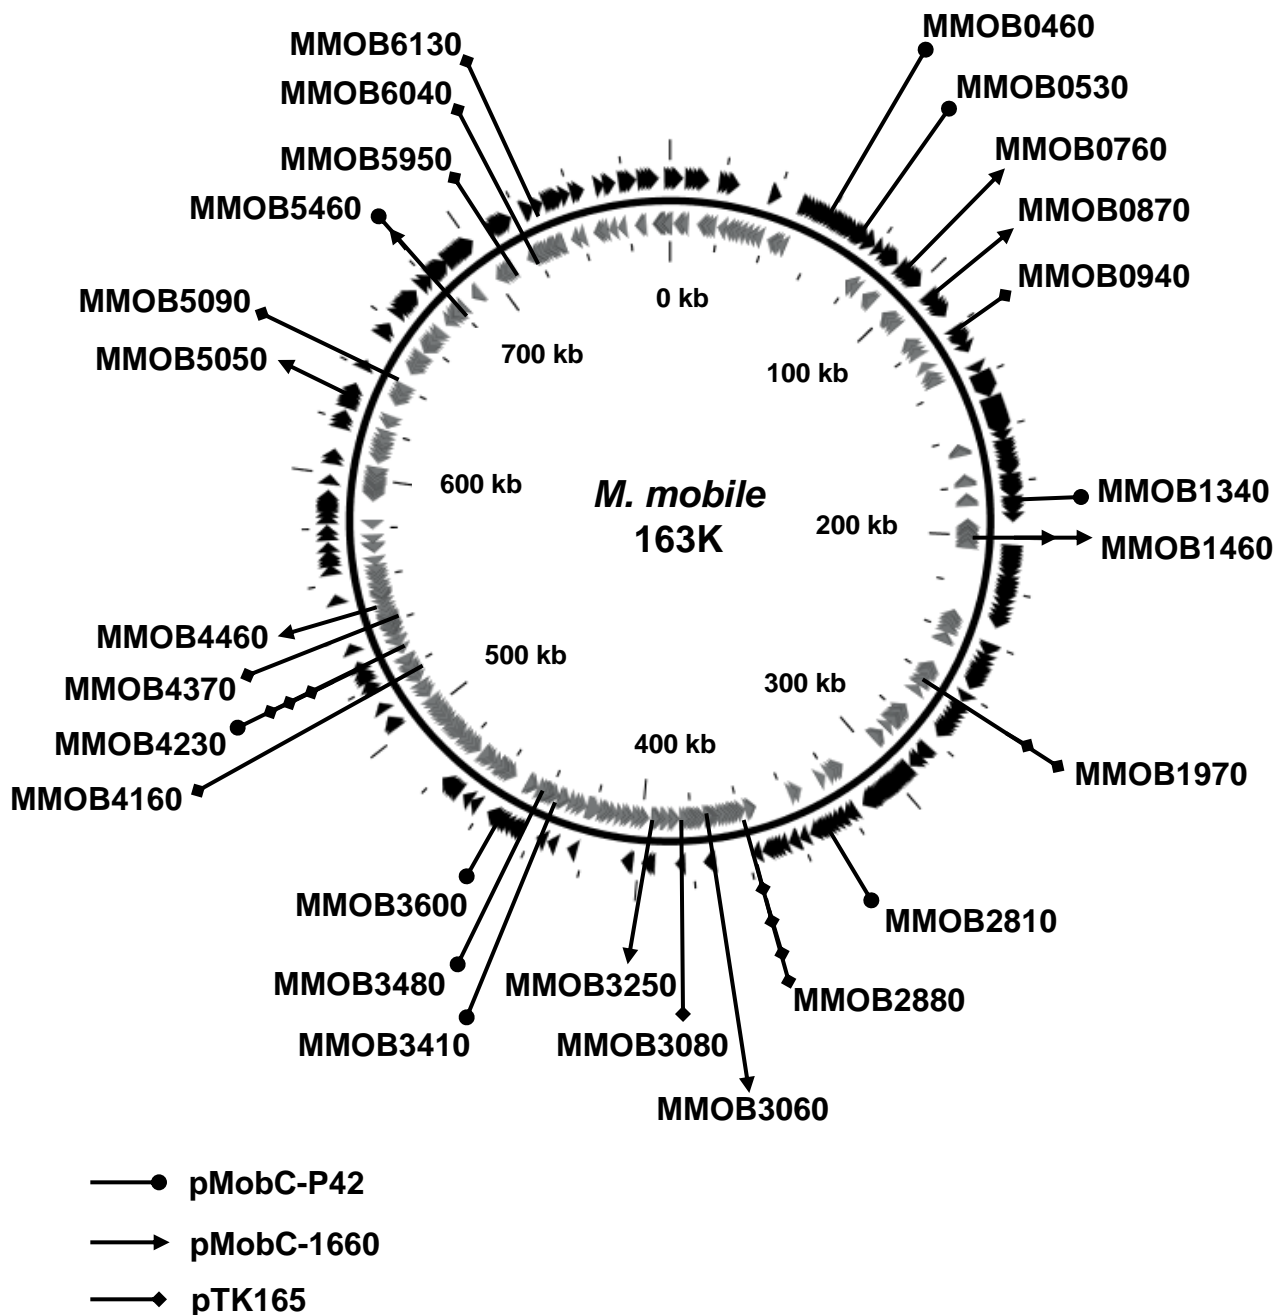

**FIG S1** Transposon insertion sites on the genome. ORFs coded on top and bottom strands are presented by solid and gray arrows, respectively. The integration sites are shown by symbols specific for three plasmids with an ORF code. Multiple insertion sites were identified in MMOBs 1460, 1970, 2880, 4230, and 5460. Positions on the genome are shown by nucleotide numbers in the circle.
