# Supplementary material
Source: PubMed Central journal article supplement (PMC4011001)
Supplement: JB.01418-13_zjb999093113so2.pdf [file JB.01418-13_zjb999093113so2.pdf]

| Vector        | ORF Inserted <sup>a</sup> | Strand <sup>b</sup> | Length (nt) <sup>c</sup> | Annotation   | Insertion Site (nt) <sup>d</sup> |
|---------------|---------------------------|---------------------|--------------------------|--------------|----------------------------------|
| <b>pTK165</b> | MMOB0940                  | +                   | 489                      | hypothetical | 123918                           |
|               | MMOB1970                  | -                   | 1050                     | hypothetical | 264009                           |
|               | 1970                      | -                   |                          |              | 264119                           |
|               | 1970                      | -                   |                          |              | 264649                           |
|               | MMOB 2880                 | -                   | 801                      | hypothetical | 353785                           |
|               | 2880                      | -                   |                          |              | 353791                           |
|               | 2880                      | -                   |                          |              | 353787                           |
|               | 2880                      | -                   |                          |              | 353753                           |
|               | MMOB 3080                 | -                   | 846                      | hypothetical | 378243                           |
|               | MMOB 4160                 | -                   | 807                      | hypothetical | 519502                           |
|               | MMOB 4230                 | -                   | 765                      | lipoprotein  | 528135                           |
|               | 4230                      | -                   |                          |              | 527346                           |
|               | MMOB 4370                 | -                   | 510                      | hypothetical | 542029                           |
|               | MMOB 5090                 | -                   | 531                      | hypothetical | 634738                           |
|               | MMOB 5950                 | -                   | 678                      | hypothetical | 729347                           |
|               | MMOB 6040                 | -                   | 597                      | hypothetical | 739377                           |
|               | 6040                      | -                   |                          |              | 739421                           |
|               | MMOB 6130                 | +                   | 534                      | hypothetical | 755537                           |
|               | <b>pMobC-P42</b>          | MMOB 0760           | +                        | 630          | <i>tmk</i>                       |
| MMOB 0870     |                           | +                   | 429                      | hypothetical | 112030                           |
| MMOB1460      |                           | -                   | 228                      | <i>secE</i>  | 201490                           |
| 1460          |                           | -                   |                          |              | 201478                           |
| MMOB 3060     |                           | -                   | 972                      | hypothetical | 374965                           |
| MMOB 3250     |                           | +                   | 591                      | hypothetical | 403886                           |

|                   |           |   |      |                             |        |
|-------------------|-----------|---|------|-----------------------------|--------|
|                   | MMOB 4460 | + | 327  | <i>arsR</i>                 | 557091 |
|                   | MMOB 5050 | + | 558  | hypothetical                | 629336 |
|                   | MMOB 5460 | - | 1641 | hypothetical                | 681087 |
|                   | MMOB 5530 | + | 1842 | <i>tktA</i>                 | 687391 |
| <b>pMobC-1660</b> | MMOB 0460 | + | 855  | COF family HAD<br>hydrolase | 64079  |
|                   | MMOB 0530 | + | 228  | hypothetical                | 72374  |
|                   | MMOB 0570 | + | 1433 | <i>polC</i>                 | 75929  |
|                   | MMOB 1340 | + | 1005 | hypothetical                | 187879 |
|                   | MMOB 2810 | + | 1188 | <i>rpoB</i>                 | 337672 |
|                   | MMOB 3410 | - | 390  | hypothetical                | 433565 |
|                   | MMOB 3480 | - | 459  | putative metal<br>binding   | 440633 |
|                   | MMOB 3600 | + | 933  | <i>holA</i>                 | 451451 |
|                   | MMOB 4230 | - | 765  | lipoprotein                 | 527768 |
|                   | MMOB 5460 | - | 1641 | hypothetical                | 680684 |

TABLE S1 Detailed information of transposon insertion sites on the genome.

<sup>a</sup> ORF identified in more than two isolates is shown by only number.

<sup>b</sup> Inserted ORF is coded on this strand.

<sup>c</sup> Length of inserted ORF.

<sup>d</sup> Transposon is inserted at the 3' end of this nucleotide.
